# Supplementary material
Source: ML conference proceedings conference paper supplement (https://proceedings.mlr.press/v108/amortila20a.html)
Supplement: Supplementary file [file amortila20a-supp.pdf]

# Appendices

## Appendix A Laundry List of Convergent Algorithms

We outline the general proof recipe, which will be re-using for the following examples.

### Proof strategy

- (P1) Let  $\mu^{(1)}, \mu^{(2)}$  be initial distributions and  $(f_0^{(1)}, f_0^{(2)})$  be the optimal coupling which minimizes  $\mathcal{W}(\mu^{(1)}, \mu^{(2)})$ ;
- (P2) Define an appropriate coupling  $f_1^{(1)} \sim \mu^{(1)}K, f_1^{(2)} \sim \mu^{(2)}K$  – e.g. by defining them to follow the same trajectories if the updates sample from the same distributions;
- (P3) Use the upper bound  $\mathcal{W}(\mu^{(1)}K, \mu^{(2)}K) \leq \mathbb{E}[\|f_1^{(1)} - f_1^{(2)}\|]$  and bound  $\mathbb{E}[\|f_1^{(1)} - f_1^{(2)}\|] \leq \rho \mathbb{E}[\|f_0^{(1)} - f_0^{(2)}\|]$  for some  $\rho < 1$  (usually follows from the recursive nature of the updates) to show that  $\mu \mapsto \mu K$  is a contraction.

### A.1 Convergence of synchronous Monte Carlo Evaluation with constant step-sizes

We prove that Monte Carlo Evaluation with synchronous updates & constant step-size converges to a stationary distribution. The algorithm aims to evaluate the value function of a given policy  $\pi$  using Monte Carlo returns. The update rule is given by:

$$\forall s \in \mathcal{S}: \quad V_{n+1}(s) = (1 - \alpha)V_n(s) + \alpha \mathcal{G}_n^\pi(s) \quad (\text{MCE})$$

where  $\mathcal{G}_n^\pi(s) = \sum_{n \geq 0} \gamma^n r_n(s_n, a_n)$  is the return of a random trajectory  $(s_n, a_n, r_n)_{n \geq 0}$  starting from  $s$ , following  $a_n \sim \pi(\cdot | s_n), r_n \sim \mathcal{R}(\cdot | s_n, a_n)$ , and  $s_{n+1} \sim \mathcal{P}(\cdot | s_n, a_n)$ .

**Theorem A.1.** *For any constant step size  $0 < \alpha \leq 1$  and initialization  $V_0 \sim \mu_0 \in \mathcal{M}(\mathbb{R}^{|\mathcal{S}|})$ , the sequence of random variables  $(V_n)_{n \geq 0}$  defined by the recursion (MCE) converges in distribution to a unique stationary distribution  $\varphi_\alpha \in \mathcal{M}(\mathbb{R}^{|\mathcal{S}|})$ .*

*Proof.* Following the proof strategy outlined above, we skip to step (P2) of the proof. We define the coupling of the updates  $(V_1^{(1)}, V_1^{(2)})$  to sample the same trajectories:

$$\left. \begin{aligned} V_1^{(1)}(s) &= (1 - \alpha)V_0^{(1)}(s) + \alpha \mathcal{G}_k^\pi(s) \\ V_1^{(2)}(s) &= (1 - \alpha)V_0^{(2)}(s) + \alpha \mathcal{G}_k^\pi(s) \end{aligned} \right\} \text{for the same } \mathcal{G}_k^\pi(s) \quad (11)$$

Note that this is a valid coupling of  $(\mu^{(1)}K_\alpha, \mu^{(2)}K_\alpha)$ , since  $V_1^{(1)}(s)$  and  $V_1^{(2)}(s)$  have access to the same sampling distributions. We upper bound  $\mathcal{W}(\mu^{(1)}K_\alpha, \mu^{(2)}K_\alpha)$  by the coupling defined in Equation (11). This gives:

$$\begin{aligned} \mathcal{W}(\mu^{(1)}K_\alpha, \mu^{(2)}K_\alpha) &\leq \mathbb{E} \left[ \left\| V_1^{(1)} - V_1^{(2)} \right\| \right] \\ &= \mathbb{E} \left[ \left\| (1 - \alpha)V_0^{(1)} + \alpha \mathcal{G}_1^\pi - \left( (1 - \alpha)V_0^{(2)} + \alpha \mathcal{G}_1^\pi \right) \right\| \right] \\ &= \mathbb{E} \left[ \left\| (1 - \alpha)(V_0^{(1)} - V_0^{(2)}) \right\| \right] \\ &= (1 - \alpha) \mathbb{E} \left[ \left\| V_0^{(1)} - V_0^{(2)} \right\| \right] = (1 - \alpha) \mathcal{W}(\mu^{(1)}, \mu^{(2)}) \end{aligned}$$

Since  $1 - \alpha < 1$ ,  $K_\alpha$  is a contraction mapping and we are done.  $\square$

### A.2 Convergence of synchronous Q-Learning with constant step-sizes

We prove that Q-Learning with synchronous updates & constant step-sizes converges to a stationary distribution. The algorithm aims to learn the optimal action-value function  $Q^*$ . The updates are given by:

$$\forall (s, a) \in \mathcal{S} \times \mathcal{A}: \quad Q_{n+1}(s, a) = (1 - \alpha)Q_n(s, a) + \alpha \left( r + \gamma \max_{a'} Q_n(s', a') \right), \quad (\text{QL})$$

where  $r \sim \mathcal{R}(\cdot|s, a)$ ,  $s' \sim \mathcal{P}(\cdot|s, a)$ , and  $\alpha > 0$ .

**Theorem A.2.** For any constant step size  $0 < \alpha \leq 1$  and initialization  $Q_0 \sim \mu_0 \in \mathcal{M}(\mathbb{R}^{|S| \times |A|})$ , the sequence of random variables  $(Q_n)_{n \geq 0}$  defined by the recursion (QL) converges in distribution to a unique stationary distribution  $\xi_\alpha \in \mathcal{M}(\mathbb{R}^{|S|})$ .

*Proof.* We use the proof outline given above, and jump straight to step (P2). We witness the same-sampling coupling again:

$$\left. \begin{aligned} Q_1^{(1)}(s, a) &= (1 - \alpha)Q_0^{(1)}(s, a) + \alpha \left( r + \gamma \max_{a'} Q_0^{(1)}(s', a') \right) \\ Q_1^{(2)}(s, a) &= (1 - \alpha)Q_0^{(2)}(s, a) + \alpha \left( r + \gamma \max_{a'} Q_0^{(2)}(s', a') \right) \end{aligned} \right\} \text{for the same } \begin{aligned} r &\sim \mathcal{R}(s, a), \\ s' &\sim \mathcal{P}(\cdot|s, a) \end{aligned}$$

The bound follows similarly, but with one additional step. Again we write  $\hat{T}(Q)(s, a) = r + \gamma \max_{a'} Q(s', a)$  for the empirical Bellman (optimality) operator.

$$\begin{aligned} \mathbb{E} \left[ \left\| \hat{T}(Q^{(1)}) - \hat{T}(Q^{(2)}) \right\| \right] &= \mathbb{E} \left[ \max_{s, a} \left| r - r + \gamma \left( \max_{a'} Q^{(1)}(s', a) - \max_{a'} Q^{(2)}(s', a) \right) \right| \right] \\ &= \gamma \mathbb{E} \left[ \max_{s, a} \left| \max_{a'} Q^{(1)}(s', a) - \max_{a'} Q^{(2)}(s', a) \right| \right] \\ &\leq \gamma \mathbb{E} \left[ \max_{s, a} \max_{a'} \left| Q^{(1)}(s', a) - Q^{(2)}(s', a) \right| \right] \\ &\leq \gamma \mathbb{E} \left[ \max_{s, a} \left| Q^{(1)}(s, a) - Q^{(2)}(s, a) \right| \right] = \gamma \mathbb{E} \left[ \left\| Q^{(1)} - Q^{(2)} \right\| \right] \quad \square \end{aligned}$$

The first inequality follows from  $|\max_{a'} Q_1(s, a') - \max_{a'} Q_2(s, a')| \leq \max_{a'} |Q_1(s, a') - Q_2(s, a')|$ , and the second inequality follows since  $Q^{(1)}$  and  $Q^{(2)}$  sampled the same  $s'$ . Concluding the proof as before we see that the kernel is contractive with Lipschitz constant  $1 + \alpha - \alpha\gamma < 1$ , and we are done.

### A.3 TD( $\lambda$ )

We prove that TD( $\lambda$ ) with synchronous updates & constant step-size converges to a stationary distribution. The algorithm aims to evaluate the value function of a given policy  $\pi$  using a convex combination of  $n$ -step returns. The update rule is given by:

$$\forall s : V_{n+1}(s) = (1 - \alpha)V_n(s, a) + \alpha(1 - \lambda) \sum_{k=1}^{\infty} \lambda^{k-1} \left( \sum_{i=0}^k \gamma^i r(s_i, a_i) + \gamma^k V_n(s_k) \right) \quad (\text{TD}(\lambda))$$

where each  $n$ -step trajectory is sampled starting from  $s$  and following policy  $\pi$ .

**Theorem A.3.** For any constant step size  $0 < \alpha \leq 1$  and initialization  $V_0 \sim \mu_0 \in \mathcal{M}(\mathbb{R}^{|S|})$ , the sequence of random variables  $(V_n)_{n \geq 0}$  defined by the recursion (TD( $\lambda$ )) converges in distribution to a unique stationary distribution  $\zeta_\alpha \in \mathcal{M}(\mathbb{R}^{|S|})$ .

*Proof.* Again, we jump straight to step (P2) of the template given above. We couple every  $n$ -step trajectory to sample the same  $n$  rewards, actions, and successor states.

$$\left. \begin{aligned} V_{k+1}^{(1)}(s) &= (1 - \alpha)V_k^{(1)}(s) + \alpha(1 - \lambda) \sum_{n=1}^{\infty} \lambda^{n-1} \left( \sum_{i=0}^{n-1} \gamma^i r_i(s_i, a_i) + \gamma^n V_k^{(1)}(s_n) \right) \\ V_{k+1}^{(2)}(s) &= (1 - \alpha)V_k^{(2)}(s) + \alpha(1 - \lambda) \sum_{n=1}^{\infty} \lambda^{n-1} \left( \sum_{i=0}^{n-1} \gamma^i r_i(s_i, a_i) + \gamma^n V_k^{(2)}(s_n) \right) \end{aligned} \right\} \begin{aligned} &\text{same} \\ &(s_i, a_i, r_i)_{i=0}^n \\ &\forall n \end{aligned}$$

By the coupling, the reward terms will cancel in every  $n$ -step trajectory. We write  $R_n^{(i)} = \sum_{i=0}^{n-1} \gamma^i r_i(s_i, a_i) + \gamma^n V_k^{(i)}(s_n)$  for the  $n$ -step return and  $\hat{T}(V)(s) = \sum_{k=1}^{\infty} \lambda^{k-1} \left( \sum_{i=0}^k \gamma^i r(s_i, a_i) + \gamma^k V_n(s_k) \right)$  for the empirical Bell-

man operator of  $\text{TD}(\lambda)$ .

$$\begin{aligned}
\mathbb{E} \left[ \left\| \hat{\mathcal{T}}(V^{(1)}) - \hat{\mathcal{T}}(V^{(2)}) \right\| \right] &= \mathbb{E} \left[ \max_s \left| \sum_{n=1}^{\infty} \lambda^{n-1} R_n^{(1)} - \sum_{n=1}^{\infty} \lambda^{n-1} R_n^{(2)} \right| \right] \\
&= \mathbb{E} \left[ \max_s \left| \sum_{n=1}^{\infty} \lambda^{n-1} (R_n^{(1)} - R_n^{(2)}) \right| \right] \\
&= \mathbb{E} \left[ \max_s \left| \sum_{n=1}^{\infty} \lambda^{n-1} \gamma^n (V^{(1)}(s_n) - V^{(2)}(s_n)) \right| \right] && \text{(reward terms cancel)} \\
&\leq \mathbb{E} \left[ \sum_{n=1}^{\infty} \lambda^{n-1} \gamma^n \max_s |V^{(1)}(s_n) - V^{(2)}(s_n)| \right] && \text{(triangle inequality)} \\
&\leq \sum_{n=1}^{\infty} \lambda^{n-1} \gamma^n \mathbb{E} \left[ \max_s |V^{(1)}(s) - V^{(2)}(s)| \right] && \text{(by the coupling)} \\
&= \sum_{n=1}^{\infty} \lambda^{n-1} \gamma^n \mathbb{E} \left[ \|V^{(1)} - V^{(2)}\| \right] = \gamma \frac{1}{1 - \lambda\gamma} \mathbb{E} \left[ \|V^{(1)} - V^{(2)}\| \right]
\end{aligned}$$

Concluding the proof as before, we have  $\mathcal{W}(\mu^{(1)}K, \mu^{(2)}K) \leq (1 - \alpha + \alpha\gamma \frac{1-\lambda}{1-\lambda\gamma})\mathcal{W}(\mu^{(1)}, \mu^{(2)})$ . Since  $1 - \alpha + \alpha\gamma \frac{1-\lambda}{1-\lambda\gamma} < 1$  we are done.  $\square$

#### A.4 SARSA with $\varepsilon$ -greedy policies

In this example we will examine the use of  $\varepsilon$ -greedy policies for control. In particular, we examine SARSA updates with  $\varepsilon$ -greedy policies. Let  $\pi(\cdot|s)$  be some base policy. The updates are as follow:

$$Q_{k+1}(s, a) = \begin{cases} (1 - \alpha)Q_k(s, a) + \alpha(r(s, a) + \gamma Q_k(s', a')) & \text{w.p. } \varepsilon \\ (1 - \alpha)Q_k(s, a) + \alpha(r(s, a) + \gamma \max_{a'} Q_k(s', a')) & \text{w.p. } 1 - \varepsilon \end{cases} \quad \text{(SARSA)}$$

where  $r \sim \mathcal{R}(\cdot|s, a)$  and  $s' \sim \mathcal{P}(\cdot|s, a)$  in both cases and  $a' \sim \pi(\cdot|s')$  in the first case.

**Theorem A.4.** For any constant step size  $0 < \alpha \leq 1$  and initialization  $Q_0 \sim \mu_0 \in \mathcal{M}(\mathbb{R}^{|\mathcal{S}| \times |\mathcal{A}|})$ , the sequence of random variables  $(Q_n)_{n \geq 0}$  defined by the recursion (SARSA) converges in distribution to a unique stationary distribution  $\theta_\alpha \in \mathcal{M}(\mathbb{R}^{|\mathcal{S}| \times |\mathcal{A}|})$ .

*Proof.* We jump straight to step (P2) of the proof template. We use the same-sampling coupling, where  $Q_1^{(1)}$  takes the greedy action if and only if  $Q_1^{(2)}$  does. In the non-greedy case, they sample the same  $a' \sim \pi(\cdot|s')$ . In all cases, both functions sample the same  $r(s, a)$  and  $s'$ .

$$\text{We write } \hat{\mathcal{T}}(Q)(s, a) = \begin{cases} r + \gamma Q(s', a') & \text{w.p. } \varepsilon \\ r + \gamma \max_{a'} Q(s', a') & \text{w.p. } 1 - \varepsilon \end{cases}$$

The bound follows similarly to the examples of  $Q$ -learning and  $\text{TD}(0)$ . We omit the subscripts on the  $Q$ -functions.

$$\begin{aligned}
\mathbb{E} \left[ \left\| \hat{\mathcal{T}}(Q^{(1)}) - \hat{\mathcal{T}}(Q^{(2)}) \right\| \right] &= \mathbb{P} \{ \text{greedy action chosen} \} \mathbb{E} \left[ \max_{s,a} \gamma |(\max_{a'} Q^{(1)}(s', a') - \max_{a'} Q^{(2)}(s', a'))| \right] \\
&\quad + \mathbb{P} \{ \text{non-greedy action chosen} \} \mathbb{E} \left[ \max_{s,a} |\gamma(Q^{(1)}(s', a') - Q^{(2)}(s', a'))| \right] \\
&\leq \varepsilon \gamma \mathbb{E} \left[ \|Q^{(1)} - Q^{(2)}\| \right] + (1 - \varepsilon) \gamma \mathbb{E} \left[ \|Q^{(1)} - Q^{(2)}\| \right] \\
&= \gamma \mathbb{E} \left[ \|Q^{(1)} - Q^{(2)}\| \right]
\end{aligned}$$

The bound  $\mathbb{E} \left[ \max_{s,a} \gamma |(\max_{a'} Q^{(1)}(s', a') - \max_{a'} Q^{(2)}(s', a'))| \right] \leq \gamma \mathbb{E} \left[ \|Q^{(1)} - Q^{(2)}\| \right]$  follows from  $|\max_{a'} Q_1(s, a') - \max_{a'} Q_2(s, a')| \leq \max_{a'} |Q_1(s, a') - Q_2(s, a')|$ , and since  $Q^{(1)}$  and  $Q^{(2)}$  sampled the

same  $s'$  in the greedy case. The bound  $\mathbb{E} [\max_{s,a} |\gamma(Q^{(1)}(s', a') - Q^{(2)}(s', a'))|] \leq \mathbb{E} [\|Q^{(1)} - Q^{(2)}\|]$  follows since  $Q^{(1)}$  and  $Q^{(2)}$  sampled the same state-action pair in the non-greedy case. Concluding the proof as before, we have that  $\mathbb{E} [\|Q_1^{(1)} - Q_1^{(2)}\|] \leq (1 - \alpha + \alpha\gamma)\mathbb{E} [\|Q_0^{(1)} - Q_0^{(2)}\|]$ , and thus the kernel is a contraction.  $\square$

### A.5 Expected SARSA with $\varepsilon$ -greedy policies

In this example we examine the Expected SARSA updates with  $\varepsilon$ -greedy policies. Let  $\pi(\cdot|s)$  be some base policy. Define  $\pi_\varepsilon(\cdot|s)$  as the  $\varepsilon$ -greedy policy which takes the greedy action with probability  $1-\varepsilon$  and  $\pi$  otherwise. The updates are as follow:

$$Q_{k+1}(s, a) = (1 - \alpha)Q_k(s, a) + \alpha \left( r(s, a) + \gamma \sum_{a'} \pi_\varepsilon(a'|s) Q_k(s', a') \right) \quad (\text{Expected-SARSA})$$

where  $r \sim \mathcal{R}(\cdot|s, a)$  and  $s' \sim \mathcal{P}(\cdot|s, a)$  in both cases and  $a' \sim \pi(\cdot|s')$  in the first case.

**Theorem A.5.** *For any constant step size  $0 < \alpha \leq 1$  and initialization  $Q_0 \sim \mu_0 \in \mathcal{M}(\mathbb{R}^{|\mathcal{S}| \times |\mathcal{A}|})$ , the sequence of random variables  $(Q_n)_{n \geq 0}$  defined by the recursion (Expected-SARSA) converges in distribution to a unique stationary distribution  $\beta_\alpha \in \mathcal{M}(\mathbb{R}^{|\mathcal{S}| \times |\mathcal{A}|})$ .*

*Proof.* We jump straight to step (P2) of the proof template. We use the same-sampling coupling.

We write  $\hat{\mathcal{T}}(Q)(s, a) = r + \gamma \sum_{a'} \pi(a'|s) Q(s', a')$ . The bound follows similarly to the examples of  $Q$ -learning and TD(0). We omit the subscripts on the  $Q$ -functions.

$$\begin{aligned} \mathbb{E} \left[ \left\| \hat{\mathcal{T}}(Q^{(1)}) - \hat{\mathcal{T}}(Q^{(2)}) \right\| \right] &= \mathbb{E} \left[ \max_{s,a} \gamma \left| \sum_{a'} \pi_\varepsilon(a'|s) Q^{(1)}(s', a') - \sum_{a'} \pi_\varepsilon(a'|s) Q^{(2)}(s', a') \right| \right] \\ &\leq \mathbb{E} \left[ \max_{s,a} \gamma \sum_{a'} \pi_\varepsilon(a'|s) |Q^{(1)}(s', a') - Q^{(2)}(s', a')| \right] \\ &\leq \mathbb{E} \left[ \max_{s,a} \gamma \sum_{a'} \pi_\varepsilon(a'|s) \left\| Q^{(1)}(s', a') - Q^{(2)}(s', a') \right\| \right] \\ &\leq \gamma \mathbb{E} \left[ \|Q^{(1)} - Q^{(2)}\| \right] \end{aligned}$$

Concluding the proof as before, we have that  $\mathbb{E} [\|Q_1^{(1)} - Q_1^{(2)}\|] \leq (1 - \alpha + \alpha\gamma)\mathbb{E} [\|Q_0^{(1)} - Q_0^{(2)}\|]$ , and thus the kernel is a contraction.  $\square$

### A.6 Double Q-Learning

In this example we will have to modify our state-space and introduce a new metric on pairs of  $Q$ -functions. The Double  $Q$ -Learning algorithm (Hasselt, 2010)<sup>1</sup> maintains two random estimates  $(Q^A, Q^B)$  and updates  $Q^A$  with probability  $p$  and  $Q^B$  with probability  $1 - p$ . Should  $Q^A$  be chosen to be updated, the update is:

$$Q_{n+1}^A(s, a) = (1 - \alpha)Q_n^A(s, a) + \alpha \left( r(s, a) + \gamma Q_n^B(s, \operatorname{argmax}_{a'} Q_n^A(s', a')) \right).$$

Analogously, the update for  $Q^B$  is:

$$Q_{n+1}^B(s, a) = (1 - \alpha)Q_n^B(s, a) + \alpha \left( r(s, a) + \gamma Q_n^A(s, \operatorname{argmax}_{a'} Q_n^B(s', a')) \right).$$

In both cases, we have  $s' \sim \mathcal{P}(\cdot|s, a)$ . For this algorithm, the updates are Markovian on *pairs* of action-value functions. Thus we set the state space to be  $\mathbb{R}^{|\mathcal{S}| \times |\mathcal{A}|} \times \mathbb{R}^{|\mathcal{S}| \times |\mathcal{A}|}$ . We choose the product metric defined by  $d_1((Q^A, Q^B), (R^A, R^B)) = \|Q^A - R^A\| + \|Q^B - R^B\|$ .

<sup>1</sup>This is the original algorithm, not the deep reinforcement learning version given in (Van Hasselt, Guez, and Silver, 2016).

**Theorem A.6.** For any constant step size  $0 < \alpha \leq 1$  and initialization  $(Q_0^A, Q_0^B) \sim \mu_0 \in \mathcal{M}(\mathbb{R}^{|\mathcal{S}| \times |\mathcal{A}|} \times \mathbb{R}^{|\mathcal{S}| \times |\mathcal{A}|})$ , the sequence of random variables  $(Q_n^A, Q_n^B)_{n \geq 0}$  defined by the Double Q-Learning recursion converges in distribution to a unique stationary distribution  $\chi_\alpha \in \mathcal{M}(\mathbb{R}^{|\mathcal{S}| \times |\mathcal{A}|} \times \mathbb{R}^{|\mathcal{S}| \times |\mathcal{A}|})$ .

*Proof.* As before, let  $\mu^{(1)}, \mu^{(2)} \in \mathcal{M}(\mathbb{R}^{|\mathcal{S}| \times |\mathcal{A}|} \times \mathbb{R}^{|\mathcal{S}| \times |\mathcal{A}|})$  be arbitrary initializations and  $(Q_0^A, Q_0^B)$  and  $(R_0^A, R_0^B)$  be the optimal coupling of  $\mathcal{W}(\mu^{(1)}, \mu^{(2)})$ . We couple  $(Q_1^A, Q_1^B)$  and  $(R_1^A, R_1^B)$  to sample the same function to be updated and the same  $s'$ . Assume for a moment that  $Q^A$  and  $R^A$  are chosen to be updated. Proceeding as in the proof of Q-Learning (cf. Theorem A.2), we find that

$$\mathbb{E} [\|Q_1^A - R_1^A\|] \leq (1 - \alpha) \mathbb{E} [\|Q_0^A - R_0^A\|] + \alpha \gamma \mathbb{E} [\|Q_0^B - R_0^B\|].$$

Analogously, if  $Q^B$  and  $R^B$  are chosen to be updated, we have:

$$\mathbb{E} [\|Q_1^B - R_1^B\|] \leq (1 - \alpha) \mathbb{E} [\|Q_0^B - R_0^B\|] + \alpha \gamma \mathbb{E} [\|Q_0^A - R_0^A\|].$$

Putting everything together, the full expectation is:

$$\begin{aligned} \mathbb{E} [d((Q_1^A, Q_1^B), (R_1^A, R_1^B))] &= \mathbb{E} [\|Q_1^A - R_1^A\| + \|Q_1^B - R_1^B\|] \\ &= \mathbb{P}\{\text{A is updated}\} \mathbb{E} [\|Q_1^A - R_1^A\| + \|Q_1^B - R_1^B\|] \\ &\quad + \mathbb{P}\{\text{B is updated}\} \mathbb{E} [\|Q_1^A - R_1^A\| + \|Q_1^B - R_1^B\|] \\ &= p \mathbb{E} [\|Q_1^A - R_1^A\| + \|Q_0^B - R_0^B\|] \\ &\quad + (1 - p) \mathbb{E} [\|Q_0^A - R_0^A\| + \|Q_1^B - R_1^B\|] \\ &\leq p ((1 - \alpha) \mathbb{E} [\|Q_0^A - R_0^A\|] + (1 + \alpha \gamma) \mathbb{E} [\|Q_0^B - R_0^B\|]) \\ &\quad + (1 - p) ((1 + \alpha \gamma) \mathbb{E} [\|Q_0^A - R_0^A\|] + (1 - \alpha) \mathbb{E} [\|Q_0^B - R_0^B\|]) \\ &\leq \frac{1}{2} (2 + \alpha \gamma - \alpha) (\mathbb{E} [\|Q_0^A - R_0^A\|] + \mathbb{E} [\|Q_0^B - R_0^B\|]) \quad (p = \frac{1}{2}) \\ &= \frac{1}{2} (2 + \alpha \gamma - \alpha) \mathbb{E} [d((Q_0^A, Q_0^B), (R_0^A, R_0^B))] \end{aligned}$$

Since  $0 \leq 1/2(2 + \alpha \gamma - \alpha) < 1$ , so we are done. We note that the first equality only follows since, under the coupling, either  $A$  or  $B$  is updated for both functions.  $\square$

## Appendix B Proofs of Section 5

**Theorem B.1.** Suppose  $\widehat{\mathcal{T}}^\pi$  is such that the updates (5) with step-size  $\alpha$  converge to a stationary distribution  $\psi_\alpha$ . If  $\widehat{\mathcal{T}}$  is an empirical Bellman operator for some policy  $\pi$ , then  $\mathbb{E}[f_\alpha] = f^\pi$  where  $f_\alpha \sim \psi_\alpha$  and  $f^\pi$  is the fixed point of  $\mathcal{T}^\pi$ .

*Proof.* Let  $f_0$  be distributed according to  $\psi_\alpha$ . Rewriting equation (5):

$$f_1 = (1 - \alpha) f_0 + \alpha \mathcal{T}^\pi f_0 + \alpha \xi(f_0), \quad (12)$$

where  $\xi(f_0) = \widehat{\mathcal{T}}^\pi(f_0, \omega) - \mathcal{T}^\pi f_0$  is a zero-mean noise term. Taking expectations on both sides, and using that  $f_1$  is also distributed according to  $\psi_\alpha$  by stationarity and that  $\mathbb{E}[\xi(f)] = 0$  for any  $f$ :

$$\begin{aligned} \overline{f_\alpha} &= (1 - \alpha) \overline{f_\alpha} + \alpha \mathbb{E}[\mathcal{T}^\pi f_0] \\ \alpha \overline{f_\alpha} &= \alpha \mathbb{E}[\mathcal{R}^\pi + \gamma \mathcal{P}^\pi f_0] \\ \overline{f_\alpha} &= \mathcal{R}^\pi + \gamma \mathcal{P}^\pi \mathbb{E}[f_0] \\ \overline{f_\alpha} &= \mathcal{T}^\pi \overline{f_\alpha} \end{aligned}$$

And therefore  $\overline{f_\alpha} = f^\pi$  since it is the unique fixed point of  $\mathcal{T}^\pi$ .  $\square$

**Theorem B.2.** Suppose  $\widehat{\mathcal{T}}^\pi$  is such that the updates (5) with step-size  $\alpha$  converge to a stationary distribution  $\psi_\alpha$ , and that  $\widehat{\mathcal{T}}^\pi$  is an empirical Bellman operator for some policy  $\pi$ . Define

$$\mathcal{C}(f) := \mathbb{E}_\omega [(\widehat{\mathcal{T}}^\pi(f, \omega) - \mathcal{T}^\pi f)(\widehat{\mathcal{T}}^\pi(f, \omega) - \mathcal{T}^\pi f)^\top]$$

to be the covariance of the zero-mean noise term  $\widehat{\mathcal{T}}^\pi(f, \omega) - \mathcal{T}^\pi f$  for a given function  $f$ . Then, the covariance of  $f_\alpha \sim \psi_\alpha$  is given by

$$\begin{aligned} (1 - (1 - \alpha)^2) \mathbb{E} [(f_\alpha - f^\pi)(f_\alpha - f^\pi)^\top] &= \alpha^2 (\gamma \mathcal{P}^\pi) \mathbb{E} [(f_\alpha - f^\pi)(f_\alpha - f^\pi)^\top] (\gamma \mathcal{P}^\pi)^\top \\ &\quad + \alpha(1 - \alpha) (\gamma \mathcal{P}^\pi) \mathbb{E} [(f_0 - f^\pi)(f_0 - f^\pi)^\top] \\ &\quad + \alpha(1 - \alpha) \mathbb{E} [(f_\alpha - f^\pi)(f_\alpha - f^\pi)^\top] (\gamma \mathcal{P}^\pi)^\top \\ &\quad + \alpha^2 \int \mathcal{C}(f) \psi_\alpha(df) \end{aligned}$$

Furthermore, we have that  $\|\mathbb{E} [(f_\alpha - f^\pi)(f_\alpha - f^\pi)^\top]\|_{op}$  is monotonically decreasing with respect to  $\alpha$ , where  $\|\cdot\|_{op}$  denotes the operator norm of a matrix. In particular,  $\lim_{\alpha \rightarrow 0} \|\mathbb{E} [(f_\alpha - f^\pi)(f_\alpha - f^\pi)^\top]\|_{op} = 0$ , and we have that:

$$\mathbb{P} \left\{ \min_i |f_\alpha(i) - f^\pi(i)| \geq \varepsilon \right\} \xrightarrow{\alpha \rightarrow 0} 0 \quad \forall \varepsilon > 0$$

We preface the proof with some useful identities. We will write the covariance in terms of the tensor product for ease of manipulations

**Lemma B.1.** Write  $\xi(f) := (\widehat{\mathcal{T}}^\pi(f, \omega) - \mathcal{T}^\pi f)$ . In the same setup as Theorem 5.2:

$$\mathbb{E} [(f_\alpha - f^\pi)(\mathcal{T}^\pi f_\alpha - f^\pi + \xi(f_0))^\top] = \mathbb{E} [(f_\alpha - f^\pi)(f_\alpha - f^\pi)^\top] (\gamma \mathcal{P}^\pi)^\top$$

and

$$\begin{aligned} \mathbb{E} \left[ ((\mathcal{T}^\pi f_\alpha - f^\pi) + \xi(f_\alpha)) ((\mathcal{T}^\pi f_\alpha - f^\pi) + \xi(f_\alpha))^\top \right] &= (\gamma \mathcal{P}^\pi) \mathbb{E} [(f_\alpha - f^\pi)(f_\alpha - f^\pi)^\top] (\gamma \mathcal{P}^\pi)^\top \\ &\quad + \int \mathcal{C}(v) \psi_\alpha(dv) \end{aligned}$$

*Proof.* Let  $f_0 \sim \psi_\alpha$ , by (5) we have  $f_1 = (1 - \alpha)f_0 + \alpha(\mathcal{T}^\pi f_0 + \xi(f_0))$  and  $f_1 \sim \psi_\alpha$ . Furthermore, the distribution of  $f_0$  is independent of the distribution of  $\omega$ . By independence,

$$\begin{aligned} \mathbb{E} [(f_0 - f^\pi)\xi(f_0)^\top] &= \mathbb{E}_{f_0} \mathbb{E}_\omega [(f_0 - f^\pi)\xi(f_0)^\top] && \text{(by independence of } f_0 \text{ and } \xi(\cdot)) \\ &= \mathbb{E}_{f_0} [(f_0 - f^\pi)(\mathbb{E}_\omega \xi(f_0))^\top] = 0 && (\mathbb{E}_\omega [\xi(f)] = 0 \text{ for every } f) \end{aligned}$$

For the first identity, note that

$$\begin{aligned} \mathbb{E} [(f_0 - f^\pi)(\mathcal{T}^\pi f_0 - f^\pi)^\top] &= \mathbb{E} [(f_0 - f^\pi)(\mathcal{R}^\pi + \gamma \mathcal{P}^\pi(f_0) - \mathcal{R}^\pi - \gamma \mathcal{P}^\pi(f^\pi))^\top] \\ &= \mathbb{E} [(f_0 - f^\pi)(\gamma \mathcal{P}^\pi(f_0 - f^\pi))^\top] \\ &= \mathbb{E} [(f_0 - f^\pi)(f_0 - f^\pi)^\top] (\gamma \mathcal{P}^\pi)^\top \\ &= \mathbb{E} [(f_0 - f^\pi)(f_0 - f^\pi)^\top] (\gamma \mathcal{P}^\pi)^\top \end{aligned}$$

The first identity then follows by using  $\mathbb{E} [(f_0 - f^\pi)\xi(f_0)^\top] = 0$  and linearity of expectations.

For the second identity, expanding the outer product gives:

$$\begin{aligned} \mathbb{E} \left[ ((\mathcal{T}^\pi f_0 - f^\pi) + \xi(f_0)) ((\mathcal{T}^\pi f_0 - f^\pi) + \xi(f_0))^\top \right] &= \mathbb{E} [(\mathcal{T}^\pi f_0 - f^\pi)(\mathcal{T}^\pi f_0 - f^\pi)^\top] \\ &\quad + \mathbb{E} [(\xi(f_0))(\xi(f_0))^\top] \\ &\quad + \mathbb{E} [(\mathcal{T}^\pi f_0 - f^\pi)(\xi(f_0))^\top] \\ &\quad + \mathbb{E} [\xi(f_0)(\mathcal{T}^\pi f_0 - f^\pi)^\top] \\ &= \mathbb{E} [(\gamma \mathcal{P}^\pi(f_0 - f^\pi))(\gamma \mathcal{P}^\pi(f_0 - f^\pi))^\top] \\ &\quad + \int \mathcal{C}(v) \psi_\alpha(dv) \\ &= (\gamma \mathcal{P}^\pi) \mathbb{E} [(f_0 - f^\pi)(f_0 - f^\pi)^\top] (\gamma \mathcal{P}^\pi)^\top \\ &\quad + \int \mathcal{C}(v) \psi_\alpha(dv) \end{aligned}$$

where we used  $\mathbb{E}[(\mathcal{T}^\pi f_0 - f^\pi)(\xi(f_0))^\top] = 0$ . □

*Proof (of Theorem 5.2).* Again let  $f_0$  be distributed according to  $\psi_\alpha$ . Subtracting  $f^\pi$  from equation (12),

$$f_1 - f^\pi = (1 - \alpha)(f_0 - f^\pi) + \alpha(\mathcal{T}^\pi f_0 - f^\pi + \xi(f_0)).$$

and taking outer products:

$$\begin{aligned} (f_1 - f^\pi)(f_1 - f^\pi)^\top &= (1 - \alpha)^2 (f_0 - f^\pi)(f_0 - f^\pi)^\top \\ &\quad + \alpha^2 (\mathcal{T}^\pi f_0 - f^\pi + \xi(f_0))(\mathcal{T}^\pi f_0 - f^\pi + \xi(f_0))^\top \\ &\quad + \alpha(1 - \alpha)(f_0 - f^\pi)(\mathcal{T}^\pi f_0 - f^\pi + \xi(f_0))^\top \\ &\quad + \alpha(1 - \alpha)(\mathcal{T}^\pi f_0 - f^\pi + \xi(f_0))(f_0 - f^\pi)^\top. \end{aligned}$$

Taking expectations on both sides, and using Lemma B.1:

$$\begin{aligned} \mathbb{E}[(f_1 - f^\pi)(f_1 - f^\pi)^\top] &= (1 - \alpha)^2 \mathbb{E}[(f_0 - f^\pi)(f_0 - f^\pi)^\top] + \alpha^2 (\gamma \mathcal{P}^\pi) \mathbb{E}[(f_0 - f^\pi)] (\gamma \mathcal{P}^\pi)^\top \\ &\quad + \alpha^2 \int \mathcal{C}(v) \psi_\alpha(dv) \\ &\quad + \alpha(1 - \alpha) (\gamma \mathcal{P}^\pi) \mathbb{E}[(f_0 - f^\pi)(f_0 - f^\pi)^\top] \\ &\quad + \alpha(1 - \alpha) \mathbb{E}[(f_0 - f^\pi)(f_0 - f^\pi)^\top] (\gamma \mathcal{P}^\pi)^\top \end{aligned}$$

Since  $\mathbb{E}[(f_1 - f^\pi)(f_1 - f^\pi)^\top] = \mathbb{E}[(f_0 - f^\pi)(f_0 - f^\pi)^\top]$  by stationarity, re-arranging to the LHS and factoring gives:

$$\begin{aligned} (1 - (1 - \alpha)^2) \mathbb{E}[(f_\alpha - f^\pi)(f_\alpha - f^\pi)^\top] &= \alpha^2 (\gamma \mathcal{P}^\pi) \mathbb{E}[(f_\alpha - f^\pi)(f_\alpha - f^\pi)^\top] (\gamma \mathcal{P}^\pi)^\top \\ &\quad + \alpha(1 - \alpha) (\gamma \mathcal{P}^\pi) \mathbb{E}[(f_0 - f^\pi)(f_0 - f^\pi)^\top] \\ &\quad + \alpha(1 - \alpha) \mathbb{E}[(f_\alpha - f^\pi)(f_\alpha - f^\pi)^\top] (\gamma \mathcal{P}^\pi)^\top \\ &\quad + \alpha^2 \int \mathcal{C}(f) \psi_\alpha(df) \end{aligned}$$

For the remainder of the proof we re-write the above expression in terms of tensor products. The tensor product of two vectors  $x, y$  is the matrix defined by  $x \otimes y = xy^\top$ . By extension, the tensor product of two matrices  $A, B$  is the operator defined by  $(A \otimes B)X = AXB^\top$ . Then, the above expression can be re-written as:

$$\begin{aligned} (1 - (1 - \alpha)^2) \mathbb{E}[(f_\alpha - f^\pi)(f_\alpha - f^\pi)^\top] &= \alpha^2 (\gamma \mathcal{P}^\pi)^{\otimes 2} \mathbb{E}[(f_\alpha - f^\pi)(f_\alpha - f^\pi)^\top] \\ &\quad + \alpha(1 - \alpha) (\gamma \mathcal{P}^\pi \otimes \mathbf{I}) \mathbb{E}[(f_0 - f^\pi)(f_0 - f^\pi)^\top] \\ &\quad + \alpha(1 - \alpha) (\mathbf{I} \otimes \gamma \mathcal{P}^\pi) \mathbb{E}[(f_\alpha - f^\pi)(f_\alpha - f^\pi)^\top] \\ &\quad + \alpha^2 \int \mathcal{C}(f) \psi_\alpha(df). \end{aligned}$$

Factoring the tensor products further gives:

$$\left[ I - ((1 - \alpha)I + \alpha \gamma \mathcal{P}^\pi)^{\otimes 2} \right] \mathbb{E}[(f_\alpha - f^\pi)^{\otimes 2}] = \alpha^2 \int \mathcal{C}(f) \psi_\alpha(df)$$

We show that the matrix on the LHS is invertible. By (Puterman, 2014, Corollary C.4) it will follow from showing that  $\rho\left(\left((1 - \alpha)I + \alpha \gamma \mathcal{P}^\pi\right)^{\otimes 2}\right) < 1$ , where  $\rho(A)$  is the spectral radius of matrix  $A$ . Writing  $\|A\|_{\text{op}} = \max_i \sum_j |A(i, j)|$  for the operator norm of a matrix  $A$ , and using that  $\rho(A) \leq \|A\|_{\text{op}}$ ,  $\|A \otimes B\|_{\text{op}} = \|A\|_{\text{op}} \|B\|_{\text{op}}$ , and  $\|P^\pi\|_{\text{op}} = \|I\|_{\text{op}} = 1$ :

$$\left\| \left( (1 - \alpha)I + \alpha \gamma \mathcal{P}^\pi \right)^{\otimes 2} \right\|_{\text{op}} = \left\| (1 - \alpha)I + \alpha \gamma \mathcal{P}^\pi \right\|_{\text{op}}^2 \leq ((1 - \alpha) + \alpha \gamma)^2 < 1, \quad (13)$$

where the last inequality followed since  $\gamma < 1$ . Finally, for the limit  $\alpha \rightarrow 0$ , we use the following identity: if  $A$  is such that  $\|I - A\| \leq 1$  then  $\|A^{-1}\| \leq \frac{1}{1 - \|I - A\|}$ . We let  $A = I - ((1 - \alpha)I + \alpha\gamma P^\pi)^{\otimes 2}$ , by the calculation in (13) we have  $\|I - A\| < 1$ . So we calculate the operator norm of the covariance matrix:

$$\begin{aligned}
 \|\mathbb{E}[(f_0 - f^\pi)(f_0 - f^\pi)^\top]\| &= \alpha^2 \left\| \left[ I - ((1 - \alpha)I + \alpha\gamma P^\pi)^{\otimes 2} \right]^{-1} \int \mathcal{C}(v)\psi_\alpha(dv) \right\| \\
 &\leq \alpha^2 \left\| \left[ I - ((1 - \alpha)I + \alpha\gamma P^\pi)^{\otimes 2} \right]^{-1} \right\| \left\| \int \mathcal{C}(v)\psi_\alpha(dv) \right\| \\
 &\leq \alpha^2 \frac{1}{1 - \left\| I - I + ((1 - \alpha)I + \alpha\gamma P^\pi)^{\otimes 2} \right\|} \left\| \int \mathcal{C}(v)\psi_\alpha(dv) \right\| \\
 &= \alpha^2 \frac{1}{1 - \left\| ((1 - \alpha)I + \alpha\gamma P^\pi)^{\otimes 2} \right\|} \left\| \int \mathcal{C}(v)\psi_\alpha(dv) \right\| \\
 &= \alpha^2 \frac{1}{1 - \left\| ((1 - \alpha)I + \alpha\gamma P^\pi) \right\|^2} \left\| \int \mathcal{C}(v)\psi_\alpha(dv) \right\| \\
 &\leq \alpha^2 \frac{1}{1 - (1 - \alpha + \alpha\gamma)^2} \left\| \int \mathcal{C}(v)\psi_\alpha(dv) \right\|
 \end{aligned}$$

Finally, since the state space is bounded in  $[0, \text{RMAX}/(1 - \gamma)]^n$ , we have  $(\widehat{\mathcal{T}}f)_i \leq \text{RMAX}/(1 - \gamma)$  and  $(\mathcal{T}f)_i \leq \text{RMAX}/(1 - \gamma)$  for each  $i$ . Then, we have  $|\xi_\omega(f)_i \xi_\omega(f)_j| = |(\widehat{\mathcal{T}}f)_i (\mathcal{T}f)_j - (\mathcal{T}f)_i (\widehat{\mathcal{T}}f)_j - (\mathcal{T}f)_j (\widehat{\mathcal{T}}f)_i + (\mathcal{T}f)_j (\mathcal{T}f)_i| \leq 4 \frac{\text{RMAX}^2}{(1 - \gamma)^2}$ . Thus we have  $\|\mathcal{C}(f)\| \leq 4 \frac{\text{RMAX}^2}{(1 - \gamma)^2} := M$  and thus

$$\|\mathbb{E}[(f_0 - f^\pi)(f_0 - f^\pi)^\top]\| \leq M \frac{\alpha^2}{1 - (1 - \alpha + \alpha\gamma)^2} \xrightarrow{\alpha \rightarrow 0} 0$$

For the concentration inequality, we will use a multivariate Chebyshev inequality (Marshall and Olkin, 1960, Theorem 3.1), whos statement is as follows:

**Theorem B.3.** *Let  $X = (X_1, \dots, X_n)$  be a random vector with  $\mathbb{E}X = 0$  and  $\mathbb{E}[X^T X] = \Sigma$ . Let  $T = T_+ \cup \{x : -x \in T_+\}$ , where  $T_+ \subseteq \mathbb{R}^n$  is a closed, convex set. If  $A = \{a \in \mathbb{R}^n : \langle a, x \rangle \geq 1 \forall x \in T_+\}$ , then*

$$\mathbb{P}\{X \in T\} \leq \inf_{a \in A} a^\top \Sigma a$$

Let  $\varepsilon > 0$ . We first bound  $a^\top \Sigma a$  with the operator norm of  $\Sigma$ . Note that

$$\begin{aligned}
 a^\top \Sigma a &= \sum_i a_i (\Sigma a)_i \\
 &\leq \sum_i a_i \|\Sigma a\| \leq n \|\Sigma\|_{\text{op}} \|a\|^2
 \end{aligned}$$

We define  $T_+$  to be the intersection of half-planes the  $\{x | x_i \geq \varepsilon\}$ , so that  $T_+ = \{x | x_i \geq \varepsilon \forall i\}$ . Since the half-planes are closed and convex,  $T_+$  is also closed and convex since it is an intersection of closed and convex sets. Then,  $T = T_+ \cup \{x : -x \in T_+\} = \{x | x_i \geq \varepsilon \forall i \text{ or } x_i \leq -\varepsilon \forall i\}$ . Note that  $x \in T \iff \min_i |x_i| \geq \varepsilon$ . We define  $X = f_\alpha - f^\pi$  which has zero-mean. Finally, Theorem B.3 states that

$$\mathbb{P}\{X \in T\} = \mathbb{P}\{f_\alpha - f^\pi \in T\} \leq \inf_{a \in A} a^\top \Sigma a \leq n \|\Sigma\|_{\text{op}} \inf_{a \in A} \|a\|^2.$$

Note that  $\inf_a \|a\|^2$  is bounded since  $a = (\frac{1}{n\varepsilon}, \frac{1}{n\varepsilon}, \dots, \frac{1}{n\varepsilon})$  is in  $A$  and  $\|a\|^2 = \frac{1}{(n\varepsilon)^2}$ . So  $n \inf_{a \in A} \|a\|^2 \leq C$  for some constant  $C$  independent of  $\alpha$ . From the previous result, we can take the limit of  $\alpha \rightarrow 0$  of  $\|\Sigma\|_{\text{op}} = \|\mathbb{E}[(f_\alpha - f^\pi)(f_\alpha - f^\pi)^\top]\|_{\text{op}}$  and obtain:

$$\mathbb{P}\{f_\alpha - f^\pi \in T\} = \mathbb{P}\left\{\min_i |f_\alpha(i) - f^\pi(i)| \geq \varepsilon\right\} \leq C \cdot \|\mathbb{E}[(f_\alpha - f^\pi)(f_\alpha - f^\pi)^\top]\|_{\text{op}} \rightarrow 0$$

□



## Appendix C Proofs of Section 6

**Lemma C.1.** *Suppose  $\pi'(s) = \operatorname{argmax}_a Q^\pi(s, a)$  for each  $s$ . Then  $K(\pi, \pi') = \mathbb{P}\{\pi' \text{ is greedy with respect to } \mathcal{G}^\pi\} > 0$ .*

We will prove an intermediate probability lemma. Let  $X_1, \dots, X_n$  be mutually independent random variables bounded in  $[a, b]$ , and  $F_i(x) = \mathbb{P}\{X_i \leq x\}$  denote the cumulative density functions of  $X_i$  for  $i = 2, \dots, n$ . Note that

$$\begin{aligned} \mathbb{P}\{X_1 \geq X_2, X_1 \geq X_3, \dots, X_1 \geq X_n\} &= \int_a^b \int_a^{x_1} \cdots \int_a^{x_1} d\mathbb{P}(x_1, \dots, x_n) \\ &= \int_a^b \int_a^{x_1} \cdots \int_a^{x_1} d\mathbb{P}_1(x_1) d\mathbb{P}_2(x_2) d\mathbb{P}_n(x_n) \quad \text{by mutual independence} \\ &= \int_a^b F_2(x_1) \cdots F_n(x_1) d\mathbb{P}_1(x_1) \\ &= \mathbb{E}[F_2(X_1)F_3(X_1) \cdots F_n(X_1)]. \end{aligned} \tag{14}$$

Then, we have:

**Lemma C.2.** *Suppose that  $\mathbb{E}[F_i(X_1)] > 0 \forall i = 2, \dots, n$ . Then also*

$$\mathbb{E}[F_2(X_1) \cdots F_n(X_1)] > 0$$

*Proof.* It is easy to see that  $H(x_1) = \prod_{i=2}^n F_i(x_1)$  is also a CDF. In particular,  $H$  starts at 0, ends at 1, and it monotone and right-continuous. In fact, by Equation (14) it corresponds to the CDF of  $\max(X_2, \dots, X_n)$ . Assume for a contradiction that  $\mathbb{E}[F_2(X_1) \cdots F_n(X_1)] = 0$ . By positivity, monotonicity, and right-continuity, we have that  $H(x_1) = 0 \forall x_1 \in [a, b]$ . Then, for every  $x$  we have

$$H(x) = 0 \implies F_i(x) = 0 \text{ for some } i.$$

Since we have  $H(b) = 1$  and  $H(x) = 0$  otherwise, note that there must exist one  $i'$  such that  $F_{i'}(b) = 1$  and  $F_{i'}(x) = 0$  otherwise. If not, then for all  $i$  there exists a  $\varepsilon_i > 0$  such that  $F_i(b - \varepsilon_i) > 0$ . By monotonicity,  $F_i(b - \min_i \varepsilon_i) > 0 \forall i$ , and thus  $H(b - \min_i \varepsilon_i) > 0$ . Thus we have  $\mathbb{E}[F_{i'}(x)] = 0$ , a contradiction.  $\square$

*Proof (Lemma C.1).* Note that

$$K(\pi, \pi') = \mathbb{P}\{\pi' \text{ is greedy with respect to } \mathcal{G}^\pi\} = \mathbb{P}\{\text{for each } s, \mathcal{G}^\pi(s, \pi'(s)) \geq \mathcal{G}^\pi(s, a) \forall a\}.$$

Fix a state  $s$ , write  $X_i(s) := G^\pi(s, a_i)$ , and without loss of generality assume that  $\pi'(s) = a_1$ . We first show that  $\mathbb{E}[F_i(X_1)] > 0$ , i.e.  $\mathbb{P}\{G^\pi(s, a_1) \geq G^\pi(s, a)\} > 0$  for all  $a$ . Suppose that it is not so, and pick  $a$  such that  $\mathbb{P}\{G^\pi(s, a_1) \geq G^\pi(s, a)\} = 0$ . Then

$$\begin{aligned} Q^\pi(s, a_1) &= \mathbb{E}[\mathcal{G}^\pi(s, a_1)] \\ &= \mathbb{P}\{\mathcal{G}^\pi(s, a_1) \geq \mathcal{G}^\pi(s, a)\} \mathbb{E}[\mathcal{G}^\pi(s, a_1) \mid \{\mathcal{G}^\pi(s, a_1) \geq \mathcal{G}^\pi(s, a)\}] \\ &\quad + \mathbb{P}\{\mathcal{G}^\pi(s, a_1) < \mathcal{G}^\pi(s, a)\} \mathbb{E}[\mathcal{G}^\pi(s, a_1) \mid \{\mathcal{G}^\pi(s, a_1) < \mathcal{G}^\pi(s, a)\}] \\ &= 0 + \mathbb{E}[\mathcal{G}^\pi(s, a_1) \mid \{\mathcal{G}^\pi(s, a_1) < \mathcal{G}^\pi(s, a)\}] \\ &< \mathbb{E}[\mathcal{G}^\pi(s, a)] = Q^\pi(s, a), \end{aligned}$$

which contradicts the fact that  $\pi'$  is greedy wrt  $Q^\pi$ . Hence  $\mathbb{E}[F_i(X_1)] > 0$ , and we apply Lemma C.2 to this set to conclude that for each  $s$ ,

$$\mathbb{P}\{G^\pi(s, a_1) \geq G^\pi(s, a), \forall a\} > 0.$$

Because the returns are mutually independent, we further know that

$$\mathbb{P}\{G^\pi(s, a_1) \geq G^\pi(s, a), \forall s, a\} = \prod_{s \in \mathcal{S}} \mathbb{P}\{G^\pi(s, a_1) \geq G^\pi(s, a), \forall a\} > 0,$$

completing the proof.  $\square$

## Appendix D On weak convergence and total variation convergence

Recall the definition of the Total Variation metric:

**Definition D.1.** The total variation metric between probability measures is defined by:

$$d_{\text{TV}}(\mu, \nu) = \sup_{\mathcal{B} \in \text{Borel}(\mathbb{R}^d)} |\mu(A) - \nu(A)|,$$

for  $\mu, \nu \in \mathcal{P}(\mathbb{R}^d)$ .

Consider a bandit with a single arm that has a deterministic reward of 0. Consider any of the classic algorithms covered in this paper, which will sample a target of 0 at every iteration. It is easy to see that the unique stationary distribution of the algorithm in this instance is a Dirac distribution at 0 (denoted  $\delta_0$ ).

Suppose a step-size of  $\alpha < 1$ . If we initialize with some  $f_0 \neq 0$  then we can see that the algorithm will never converge to the true stationary distribution in Total Variation distance. This is because a Dirac distribution at any  $x \neq 0$  is always a constant distance of 1 away from a Dirac at 0. In other words,

$$d_{\text{TV}}(\delta_0, \delta_{f_n}) = 1 \quad \forall n$$

despite the fact that  $f_n \rightarrow 0$ . On the other hand, we have

$$\mathcal{W}(\delta_0, \delta_{f_n}) \rightarrow 0,$$

since the Wasserstein metric takes into consideration the underlying metric structure of the space.
